# Supplementary material for: An effective design strategy for thermally activated delayed fluorescence emitters with aggregation-induced emission to enable sky-blue OLEDs that achieve an EQE of nearly 30%
Source: PubMed Central journal article supplement — Chem Sci. 2024 Nov 20;16(1):156–62. doi: 10.1039/d4sc06613h (PMC11591721; doi:10.1039/d4sc06613h), 2024-11-20
Supplement: SC-OLF-D4SC06613H-s001.pdf [file SC-OLF-D4SC06613H-s001.pdf]

## Supporting Information

### Photophysical Characterization and Rate Constants Analysis

UV-visible absorption spectra were acquired from a Hitachi U-3900 spectrophotometer at 298 K. Doped films were prepared by vacuum deposition, and PL quantum yields (PLQYs), transient PL decay characteristics were conducted. PLQYs were determined on a Horiba JY FL-3 spectrometer equipped with a calibrated integrating sphere. Transient PL decay characteristics were recorded on an Edinburgh FLS 1000 spectrometer. Time-resolved transient PL decay measurements were carried out to investigate delayed fluorescence phenomenon of the molecules in doped films (20 wt% 32cICBP, 32cICXT and 32PcICXT in DPEPO). Rate constants of different kinetic processes were calculated following the equations (S1) - (S6) below:

$$k_p = 1 / \tau_p \quad \text{S1}$$

$$k_d = 1 / \tau_d \quad \text{S2}$$

$$k_r = \Phi_{PF} \times k_p + \Phi_{DF} \times k_d \quad \text{S3}$$

$$k_{nr} = (1 - \Phi_{PL}) \times k_r / \Phi_{PL} \quad \text{S4}$$

$$k_{ISC} = k_p - k_{r,s} - k_{nr} \quad \text{S5}$$

$$k_{RISC} = (k_p \times k_d \times \Phi_{DF}) / (k_{ISC} \times \Phi_{PL}) \quad \text{S6}$$

Where  $k_p$ ,  $k_d$ ,  $k_r$ ,  $k_{nr}$ ,  $k_{ISC}$ ,  $k_{RISC}$  represent the rate constant of prompt fluorescence decay, delayed fluorescence decay, radiation, non-radiation, intersystem crossing and reverse intersystem crossing, respectively;  $\Phi_{PL}$ ,  $\Phi_{PF}$ ,  $\Phi_{DF}$ ,  $\tau_p$  and  $\tau_d$  represent total PLQY, quantum yield of the prompt component, quantum yield of the delayed component, lifetimes of the prompt and delayed components, respectively.

### Single-Crystal Structure

Single-crystal X-ray data were determined using a Bruker APEX-II CCD X-ray Single Crystal Diffractometer with a (GaK $\alpha$ ) X-ray source, and single crystals were obtained by slow evaporation of CH<sub>2</sub>Cl<sub>2</sub>/methanol mixed solvents for 32cICBP (CCDC: 2387339) and CH<sub>2</sub>Cl<sub>2</sub>/nH mixed solvents for 32cICXT (CCDC:2387345).

### Thermal and Electrochemical Characterization

Using a NETZSCH DSC 214, differential scanning calorimetry (DSC) measurements were carried out in a N<sub>2</sub> environment at a heating rate of 10 °C·min<sup>-1</sup>. Using a NETZSCH TG 209F1 Libra, thermogravimetric analyses (TGA) were performed at a heating rate of 10 °C min<sup>-1</sup> in a N<sub>2</sub> environment. On an electrochemical workstation VMP300 (Bio-Logic), cyclic voltammetry was performed. At a scan rate of 100 mV s<sup>-1</sup>, the oxidation/reduction potentials were measured in dry dichloromethane solutions with 0.1 M TBAPF<sub>6</sub> (tetra butylammoniumhexafluorophosphate) as a supporting electrolyte. HOMO = -4.8 - (E<sub>ox</sub> - E<sub>1/2(Ferrocene)</sub>), LUMO = HOMO + E<sub>g</sub>, where E<sub>ox</sub> represents the onset oxidation potentials, E<sub>1/2(Ferrocene)</sub> represents the oxidation potential of ferrocene (F<sub>c</sub>/F<sub>c+</sub>), and E<sub>g</sub> represent optical bandgap obtained from the absorption onset.

### Device Fabrication and Measurement

The ITO substrates were carefully cleaned with 5% decon water, acetone, and isopropyl alcohol in sequence, and then dried. At vacuum pressure lower than 4×10<sup>-4</sup> Pa, organic materials and metal

layers were deposited sequentially on the ITO substrates. The electroluminescence spectra and current density-voltage-luminance (J-V-L) characteristics were measured using a TOPCON-SR-UL1R and a Keithley 2400 source.

## Synthesis

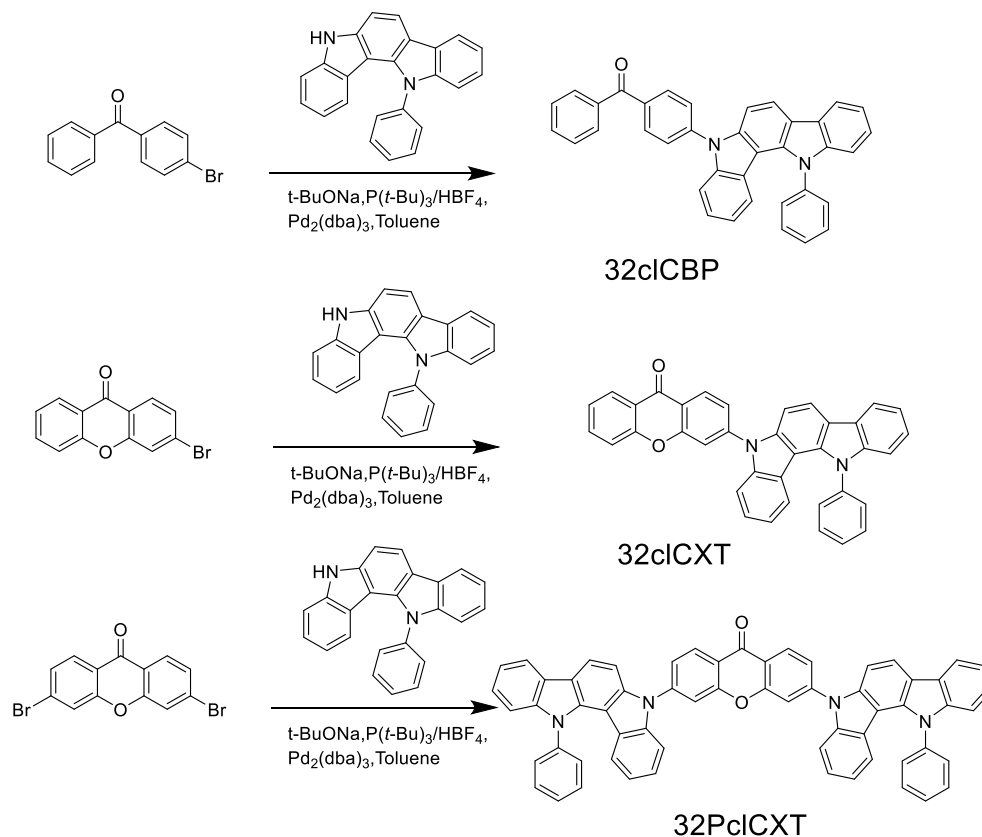

Scheme S1 The synthetic routes of 32cICBP, 32cICXT, 32PcICXT.

**32cICBP:** To a solution of 4-Bromobenzophenone (0.60 g, 2.3 mmol) in degassed toluene (30 mL), 5,12-Dihydro-12-phenylindolo[3,2-*a*]carbazole (0.84 g, 2.53 mmol),  $t\text{-BuONa}$  (0.88 g, 9.2 mmol),  $\text{P}(t\text{-Bu})_3/\text{HBF}_4$  (0.2g, 0.68 mmol), and  $\text{Pd}_2(\text{dba})_3$  (0.05 g, 0.087 mmol) were added, and the reaction solution was stirred at 120 °C under argon for 10 h. After cooling to room temperature, the mixture was poured into water and extracted with dichloromethane for several times. The combined organic layers were dried over anhydrous sodium sulphate. The mixture was then filtered, and the solvent of the filtrate was removed by rotary evaporation. The crude product was purified by column chromatography on silica gel with *n*-hexane/dichloromethane ( $v/v = 2/1$ ) as eluent to get white powder in 50% yield (0.60 g).  $^1\text{H NMR}$  (600 MHz, Methylene Chloride- $d_2$ )  $\delta$  8.23 (d,  $J = 8.6$  Hz, 1H), 8.16 (d,  $J = 7.0$  Hz, 1H), 8.10 (d,  $J = 8.4$  Hz, 2H), 7.93 (d,  $J = 8.3$  Hz, 2H), 7.77 (d,  $J = 8.4$  Hz, 2H), 7.72 – 7.63 (m, 6H), 7.58 (t,  $J = 7.7$  Hz, 2H), 7.44 (dd,  $J = 21.3, 8.4$  Hz, 2H), 7.40 – 7.31 (m,

3H), 7.26 (t,  $J = 7.6$  Hz, 1H), 6.82 (t,  $J = 7.7$  Hz, 1H), 5.98 (d,  $J = 8.0$  Hz, 1H).  $^{13}\text{C}$  NMR (151 MHz,  $\text{CD}_2\text{Cl}_2$ )  $\delta$  195.37, 142.06, 141.47, 141.10, 140.35, 139.98, 137.48, 136.80, 136.70, 132.61, 131.77, 129.98, 129.95, 129.14, 128.57, 128.43, 127.47, 124.58, 124.44, 124.26, 123.62, 121.78, 120.48, 119.87, 118.90, 118.61, 117.81, 110.19, 109.15, 108.22, 103.51. HR-MS (APCI):  $m/z$  calcd for  $\text{C}_{37}\text{H}_{24}\text{N}_2\text{O}$   $[\text{M}+\text{H}]^+$  513.19614, found 513.19634.

**32cICXT:** The procedure was analogous to that described for 32cIC-BP. Green solid of 32cIC-XT was obtained in 74% yield (0.71 g).  $^1\text{H}$  NMR (600 MHz, Methylene Chloride- $d_2$ )  $\delta$  8.28 – 8.15 (m, 8H), 7.85 (d,  $J = 8.3$  Hz, 4H), 7.73 – 7.63 (m, 10H), 7.48 (dd,  $J = 19.7, 8.3$  Hz, 4H), 7.41 – 7.27 (m, 8H), 6.83 (t,  $J = 7.6$  Hz, 2H), 6.00 (d,  $J = 8.1$  Hz, 2H).  $^{13}\text{C}$  NMR (151 MHz,  $\text{CD}_2\text{Cl}_2$ )  $\delta$  194.40, 142.09, 141.74, 141.08, 140.35, 139.98, 136.82, 136.50, 131.84, 129.96, 129.15, 128.59, 127.62, 124.62, 124.47, 124.26, 123.66, 121.84, 120.50, 119.94, 118.92, 118.65, 117.87, 110.21, 109.16, 108.28, 103.51. HR-MS (APCI):  $m/z$  calcd for  $\text{C}_{37}\text{H}_{22}\text{N}_2\text{O}_2$   $[\text{M}+\text{H}]^+$  527.17540, found 527.17562.

**32PclCXT:** The procedure was analogous to that described for 32cIC-BP. Green solid of 32PclC-XT was obtained in 74% yield (0.89 g).  $^1\text{H}$  NMR (600 MHz, Methylene Chloride- $d_2$ )  $\delta$  8.63 (d,  $J = 8.4$  Hz, 2H), 8.23 (d,  $J = 8.6$  Hz, 2H), 8.16 (d,  $J = 7.4$  Hz, 2H), 7.86 (s, 2H), 7.75 (d,  $J = 8.5$  Hz, 2H), 7.71 – 7.63 (m, 10H), 7.53 (dd,  $J = 13.7, 8.5$  Hz, 4H), 7.39 – 7.26 (m, 8H), 6.84 (t,  $J = 7.7$  Hz, 2H), 5.99 (d,  $J = 8.2$  Hz, 2H).  $^{13}\text{C}$  NMR (151 MHz,  $\text{CD}_2\text{Cl}_2$ )  $\delta$  175.40, 157.30, 143.89, 142.14, 140.72, 140.30, 139.68, 136.77, 129.97, 129.12, 128.60, 128.51, 124.78, 124.59, 124.18, 123.74, 123.63, 122.09, 120.94, 120.54, 120.29, 118.98, 118.79, 118.21, 116.51, 110.23, 109.16, 108.55, 103.45. HR-MS (APCI):  $m/z$  calcd for  $\text{C}_{61}\text{H}_{36}\text{N}_4\text{O}_2$   $[\text{M}+\text{H}]^+$  857.29110, found 857.29136.

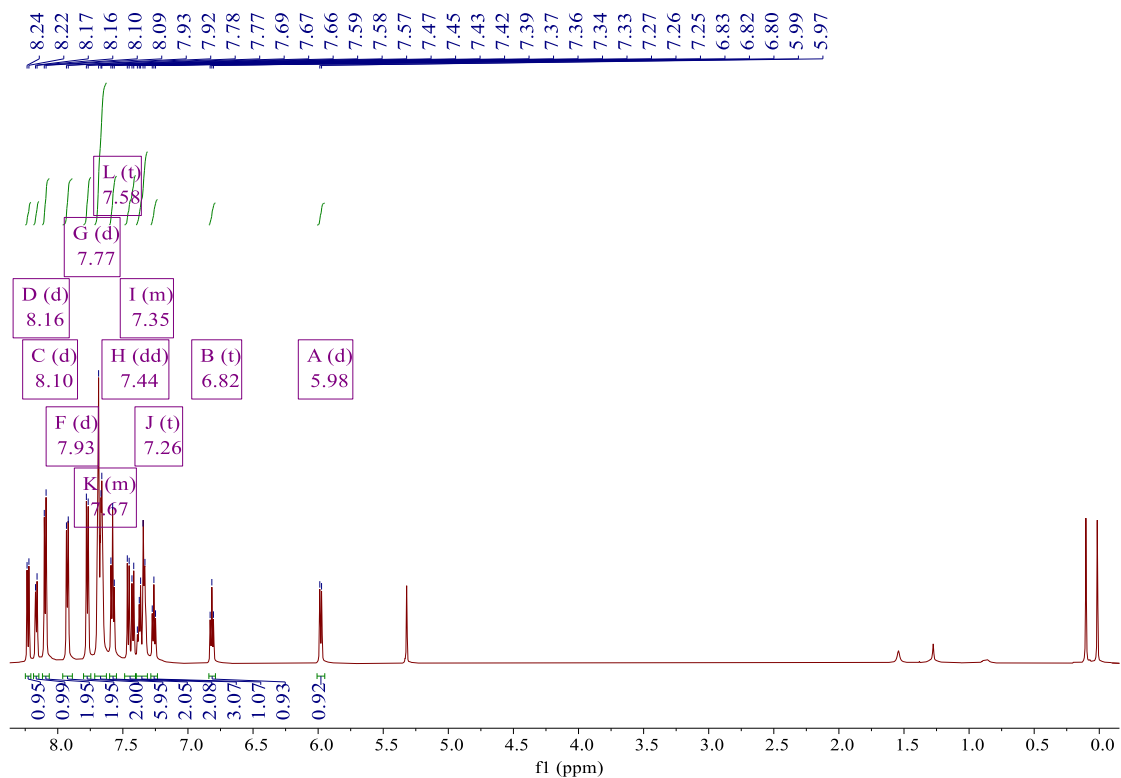

Fig. S1 The  $^1\text{H}$  NMR of 32clCBP ( $\text{CD}_2\text{Cl}_2$ ).

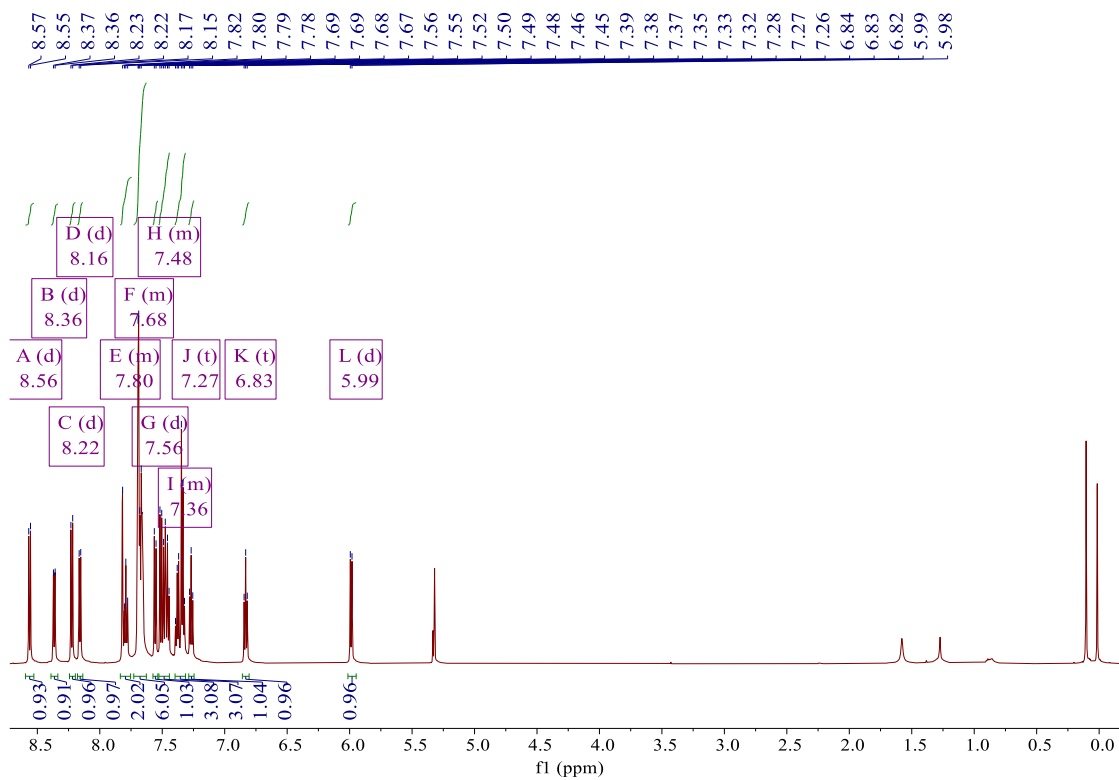

Fig. S2 The  $^1\text{H}$  NMR of 32clCXT ( $\text{CD}_2\text{Cl}_2$ ).

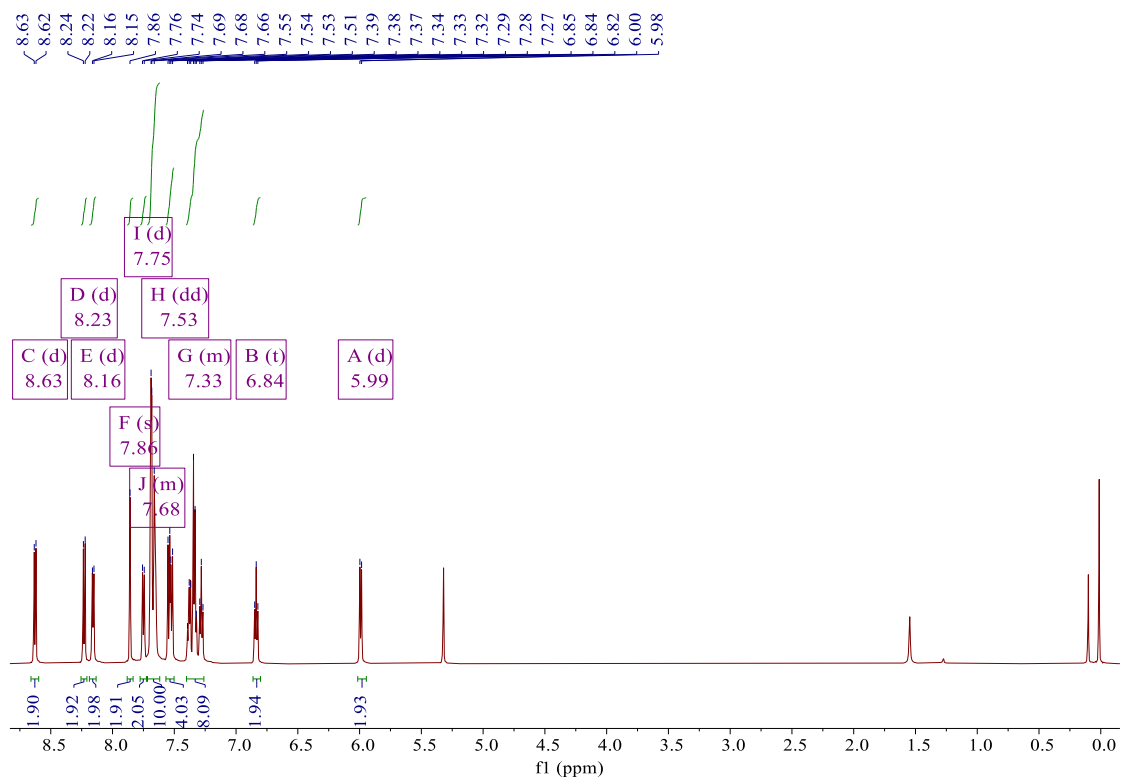

Fig. S3 The  $^1\text{H}$  NMR of  $^{32}\text{PclCXT}$  ( $\text{CD}_2\text{Cl}_2$ ).

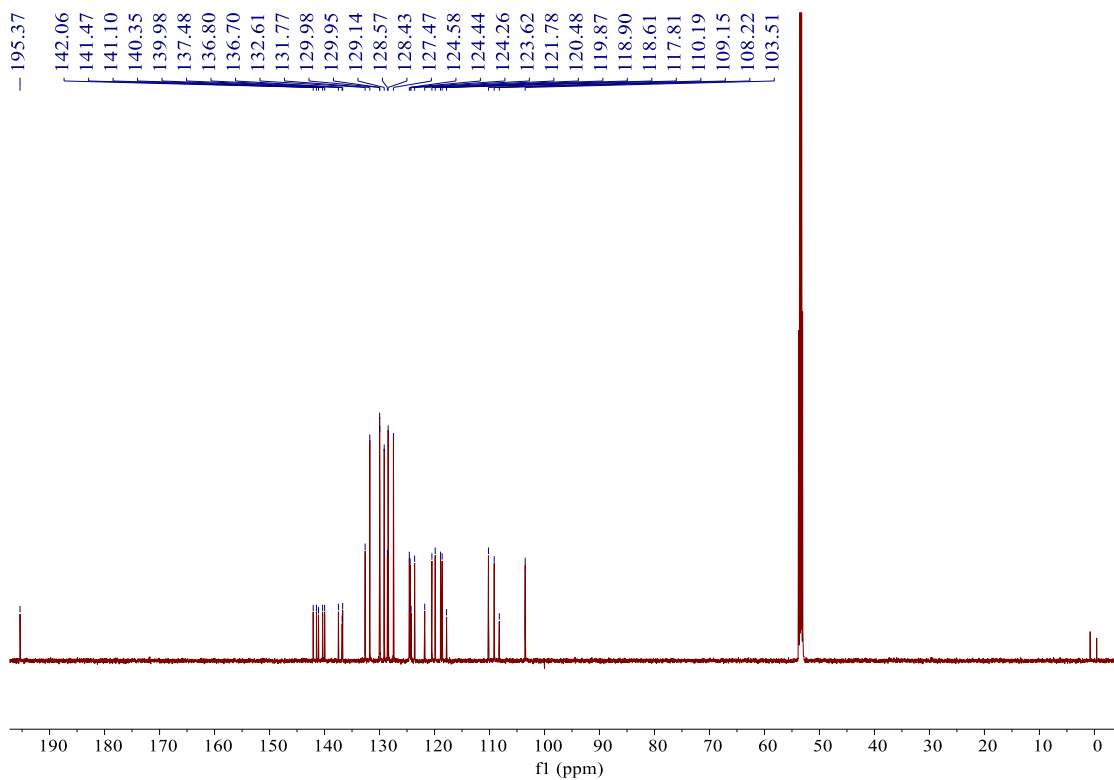

Fig. S4 The  $^{13}\text{C}$  NMR of  $^{32}\text{PclCBP}$  ( $\text{CD}_2\text{Cl}_2$ ).

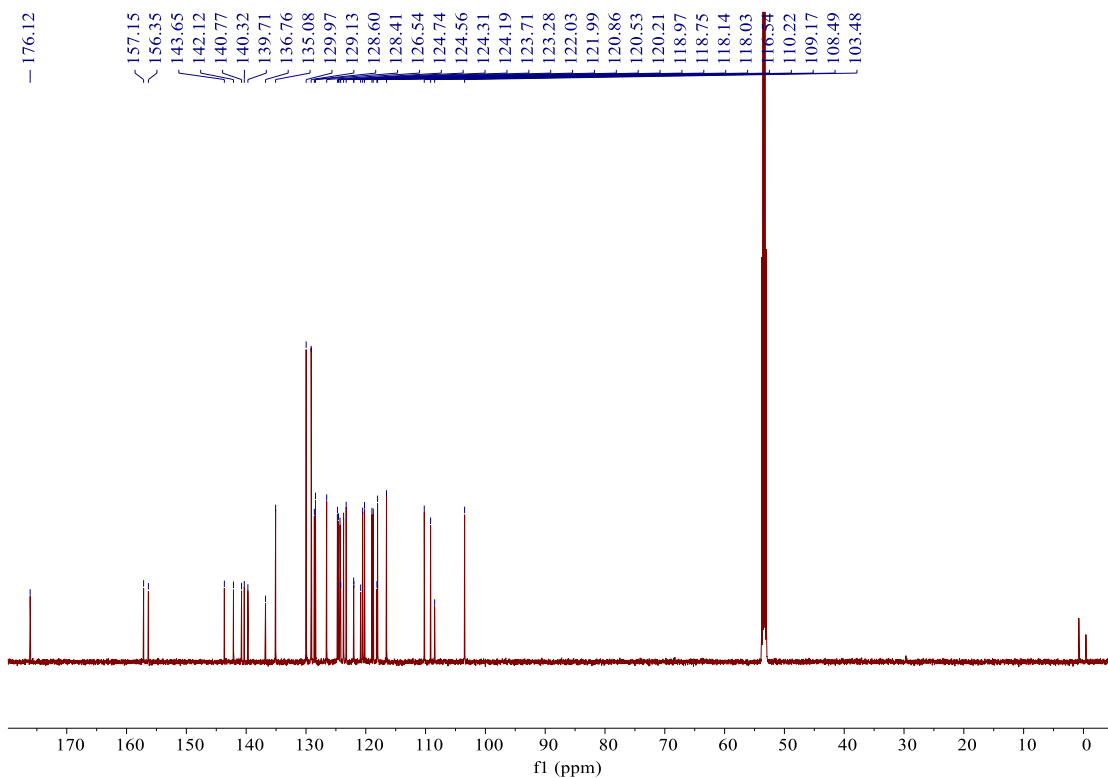

Fig. S5 The  $^{13}\text{C}$  NMR of 32ClCXT ( $\text{CD}_2\text{Cl}_2$ ).

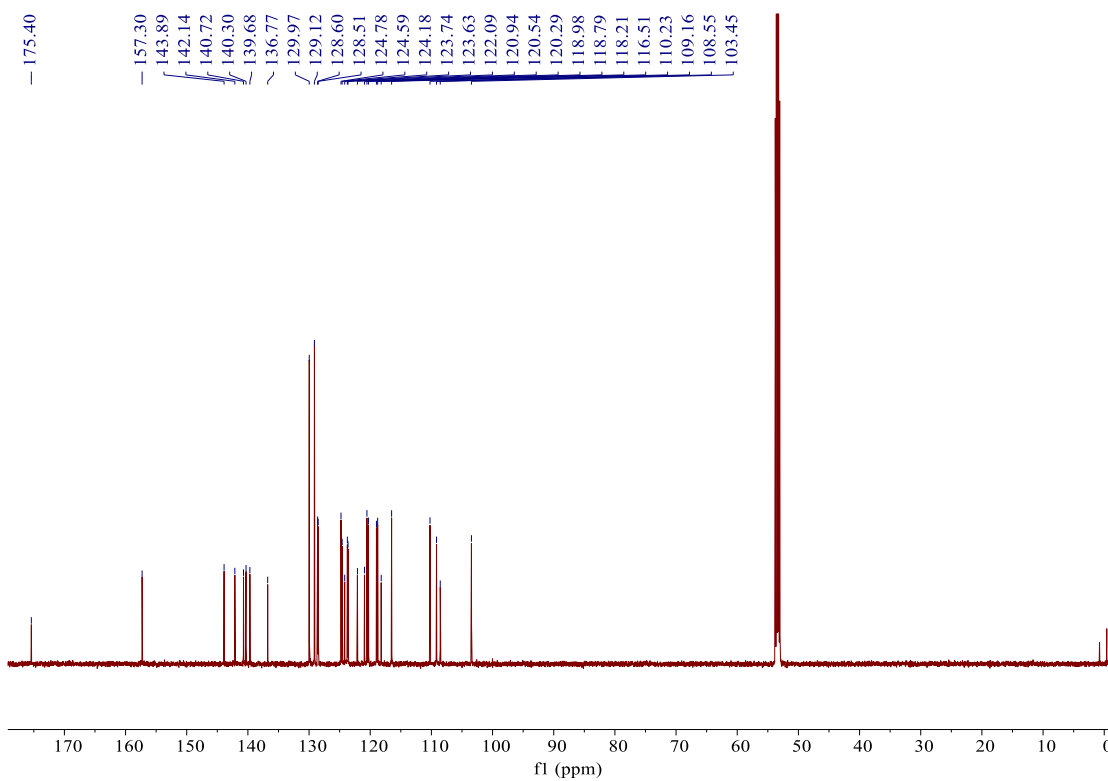

Fig. S6 The  $^{13}\text{C}$  NMR of 32PcICXT ( $\text{CD}_2\text{Cl}_2$ ).

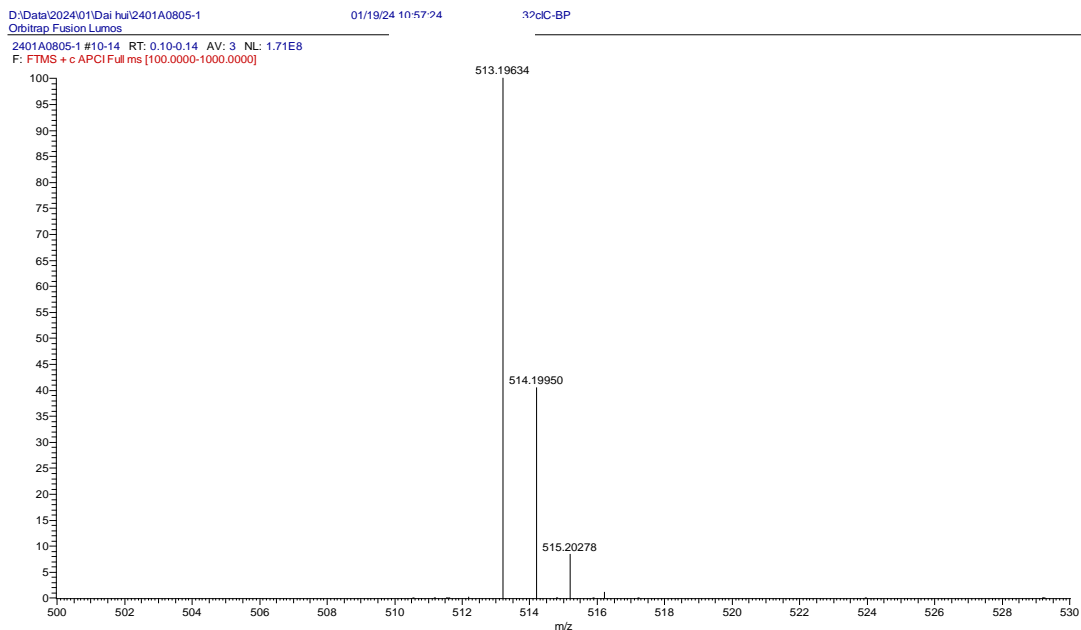

Fig. S7 The HRMS spectrum of 32cC-BP.

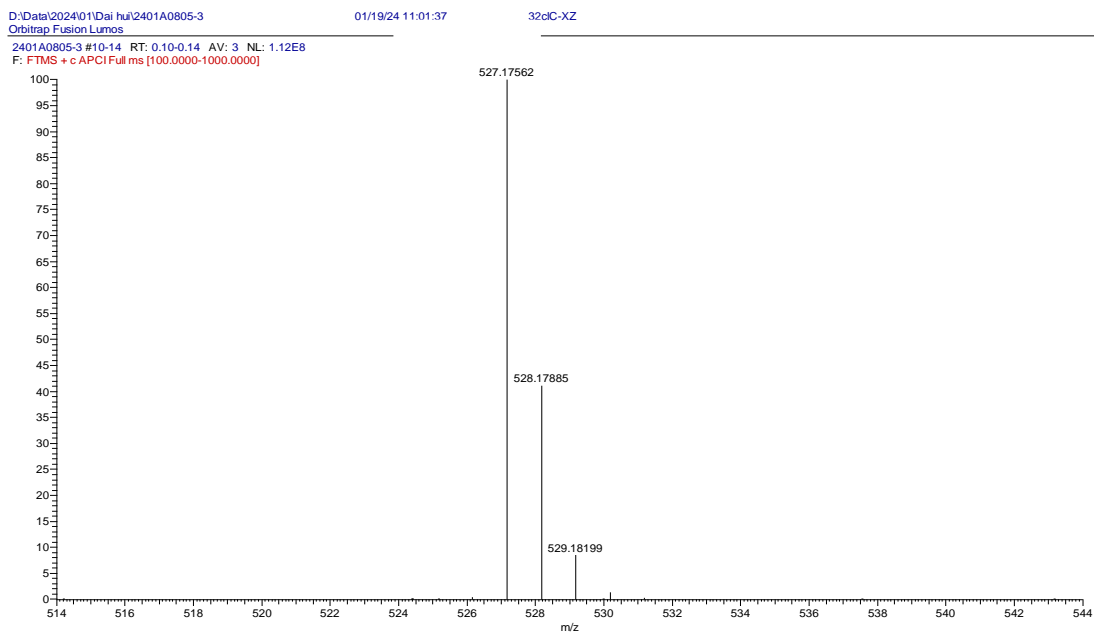

Fig. S8 The HRMS spectrum of 32cC-XZ.

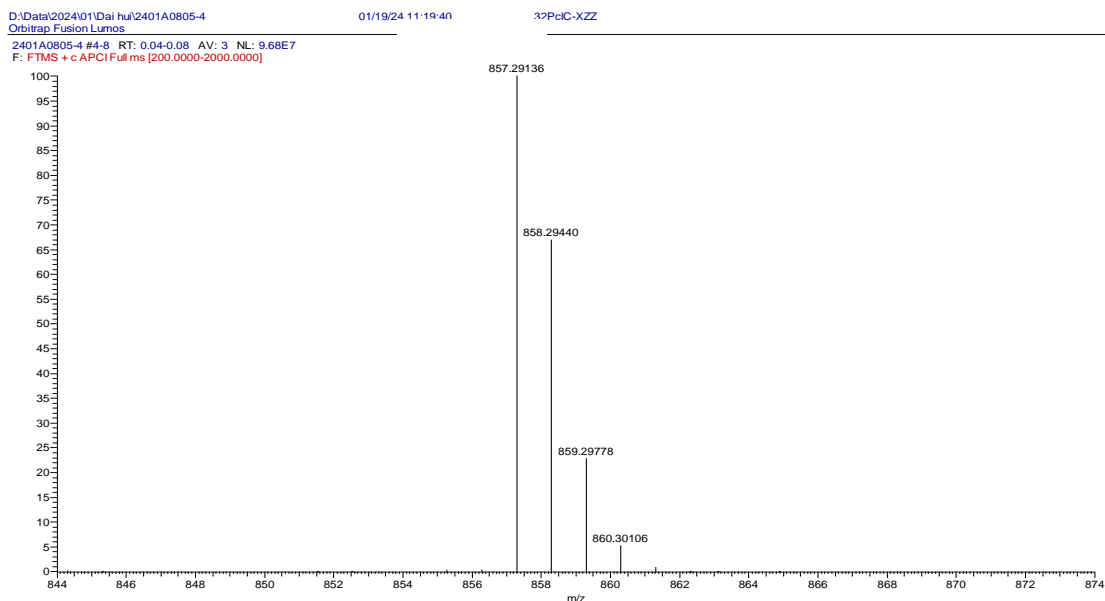

Fig. S9 The HRMS spectrum of 32PclCXT.

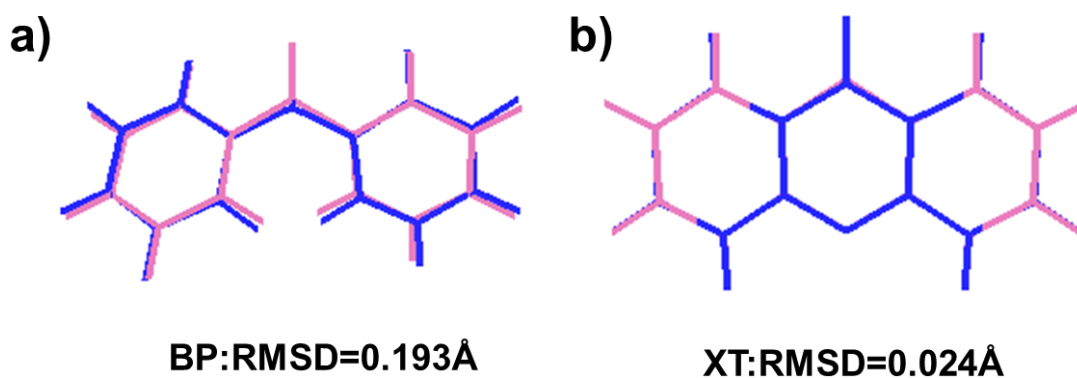

Fig. S10 Geometry comparison between  $S_0$  (pink) and  $S_1$  (blue) states of (a) BP and (b) XT.

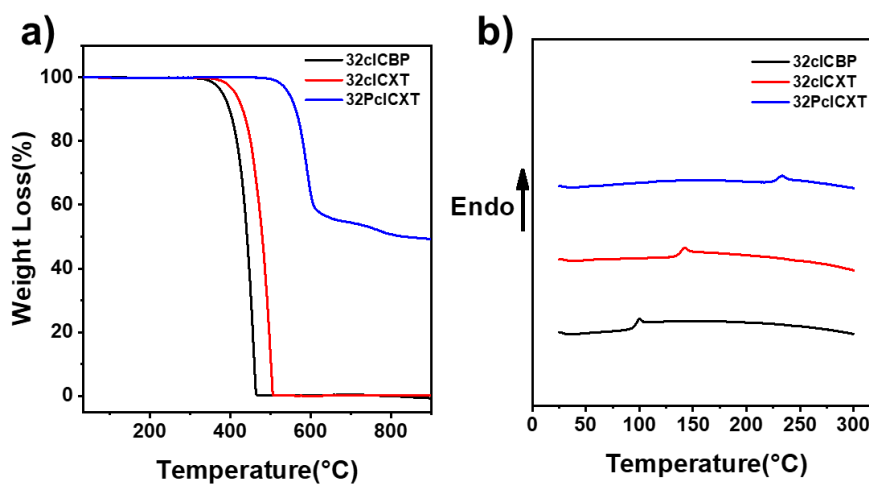

Fig. S11 (a) Thermogravimetric analysis curves, and (b) differential scanning calorimetry curves of 32clCBP, 32clCXT, 32PclCXT.



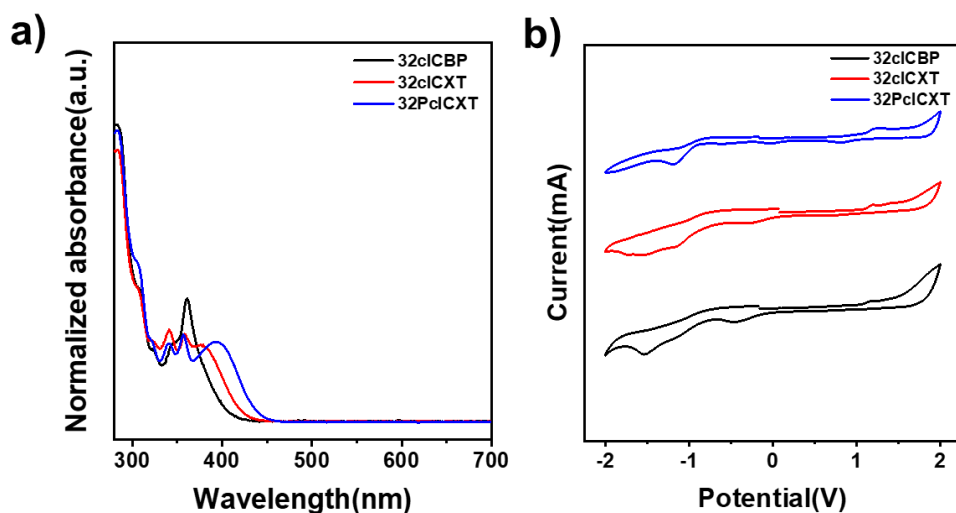

Fig. S12 (a) Ultraviolet-visible absorption spectra of 32cICBP, 32cICXT and 32PcICXT in DCM solutions. (b) Cyclic voltammetry measurements of 32cICBP, 32cICXT and 32PcICXT.

Table S1 Electrochemical parameters of 32cICBP, 32cICXT and 32PcICXT.

| Molecule | HOMO (eV) | LUMO (eV) | $E_g$ (eV) |
|----------|-----------|-----------|------------|
| 32cICBP  | -5.36     | -2.43     | 2.93       |
| 32cICXT  | -5.39     | -2.53     | 2.86       |
| 32PcICXT | -5.38     | -2.63     | 2.75       |

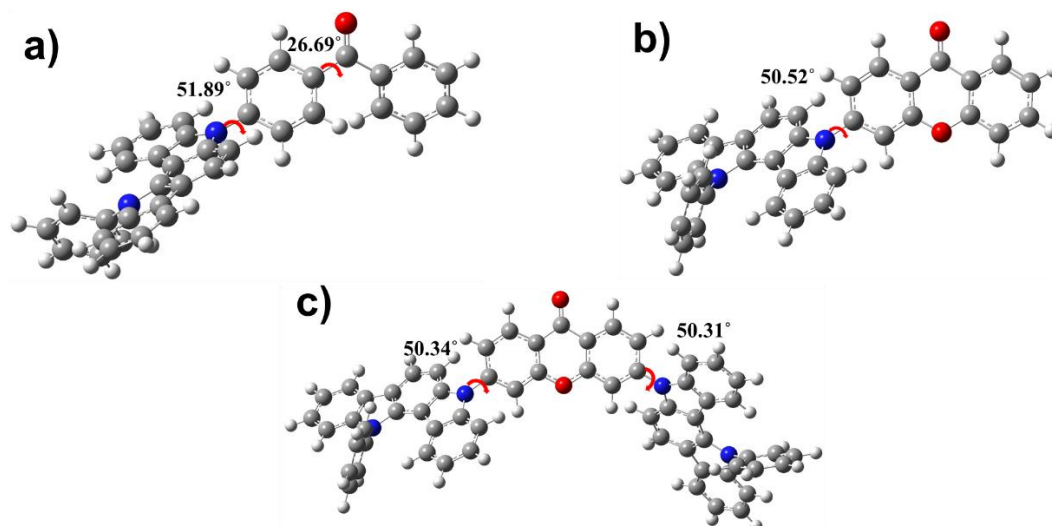

Fig. S13 Calculated dihedral angles in (a) 32cICBP, (b) 32cICXT, and (c) 32PcICXT from their optimized structures in  $S_0$  state.

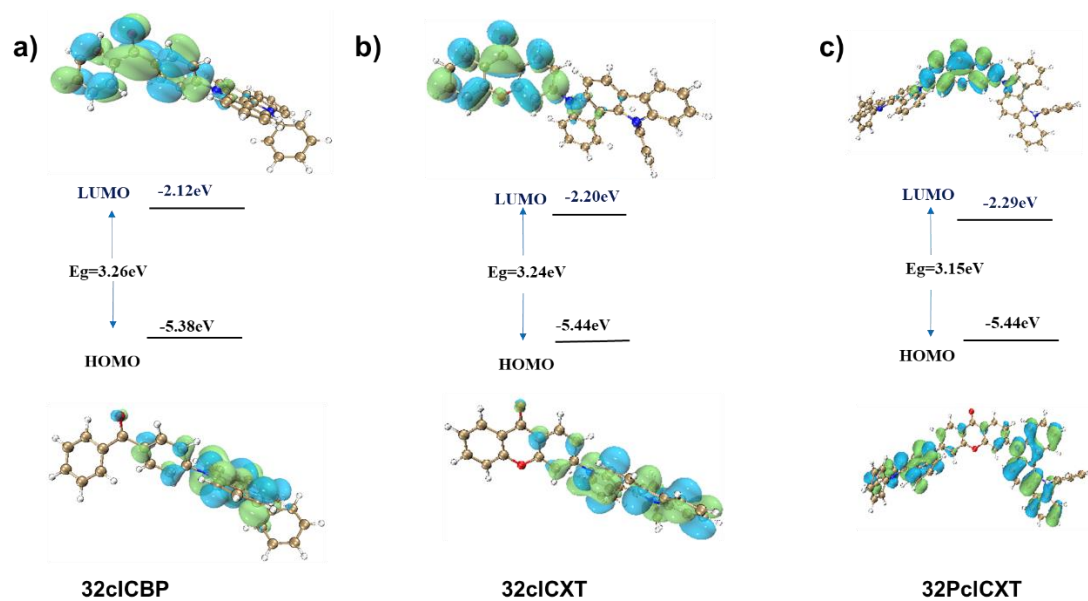

Fig. S14 Spatial HOMO and LUMO distributions of 32clCBP, 32clCXT and 32PclCXT.

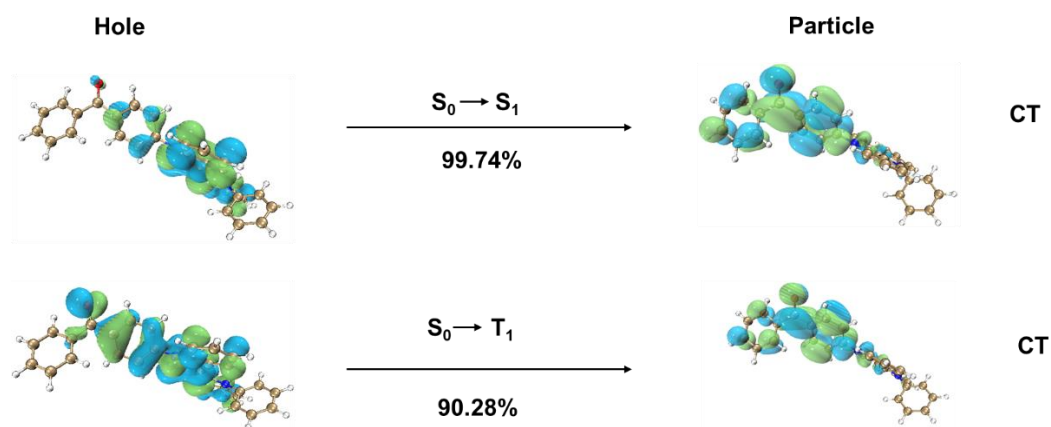

Fig. S15 The NTO analysis of  $S_1$  and  $T_1$  states for 32clCBP.

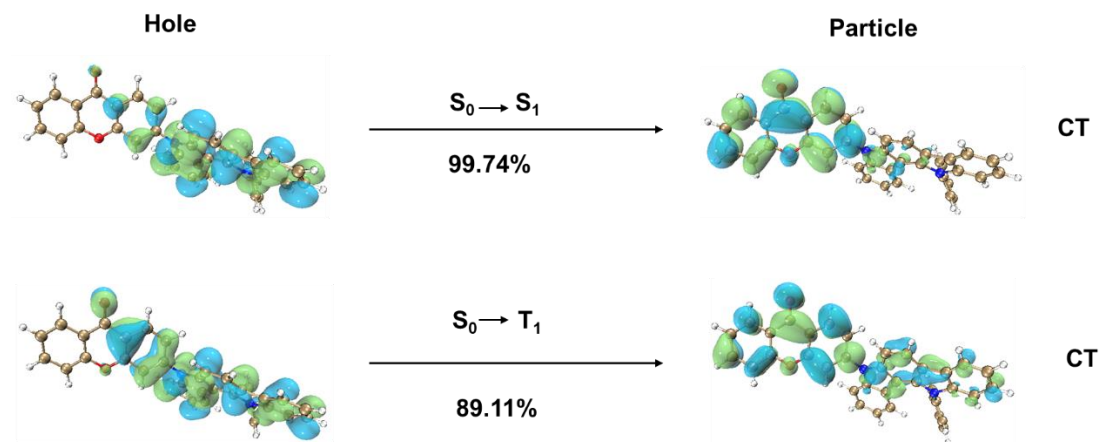

Fig. S16 The NTO analysis of  $S_1$  and  $T_1$  states for 32clCXT.

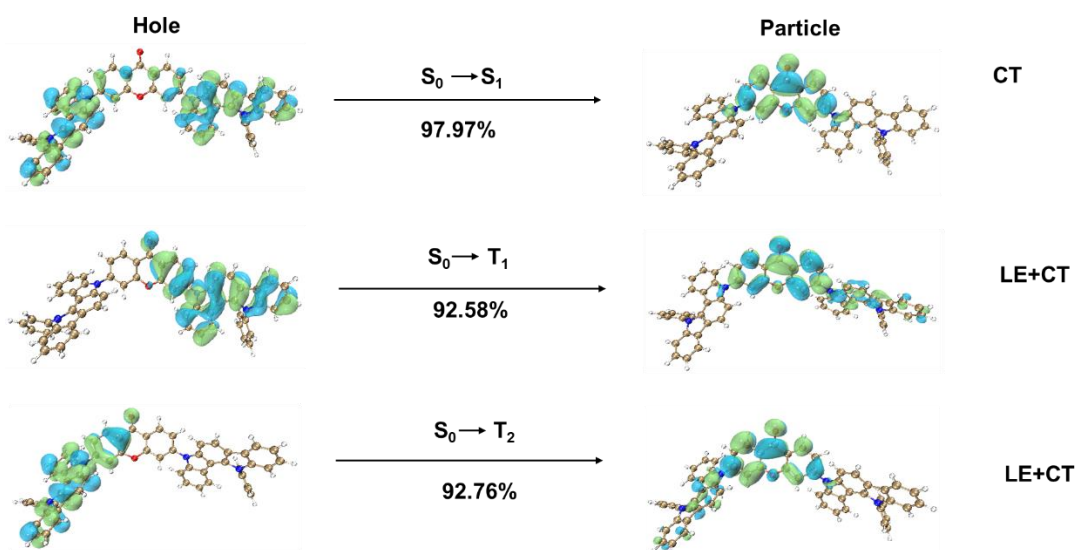

Fig. S17 The NTO analysis of  $S_1$  and  $T_1$  states for 32PcCXt.

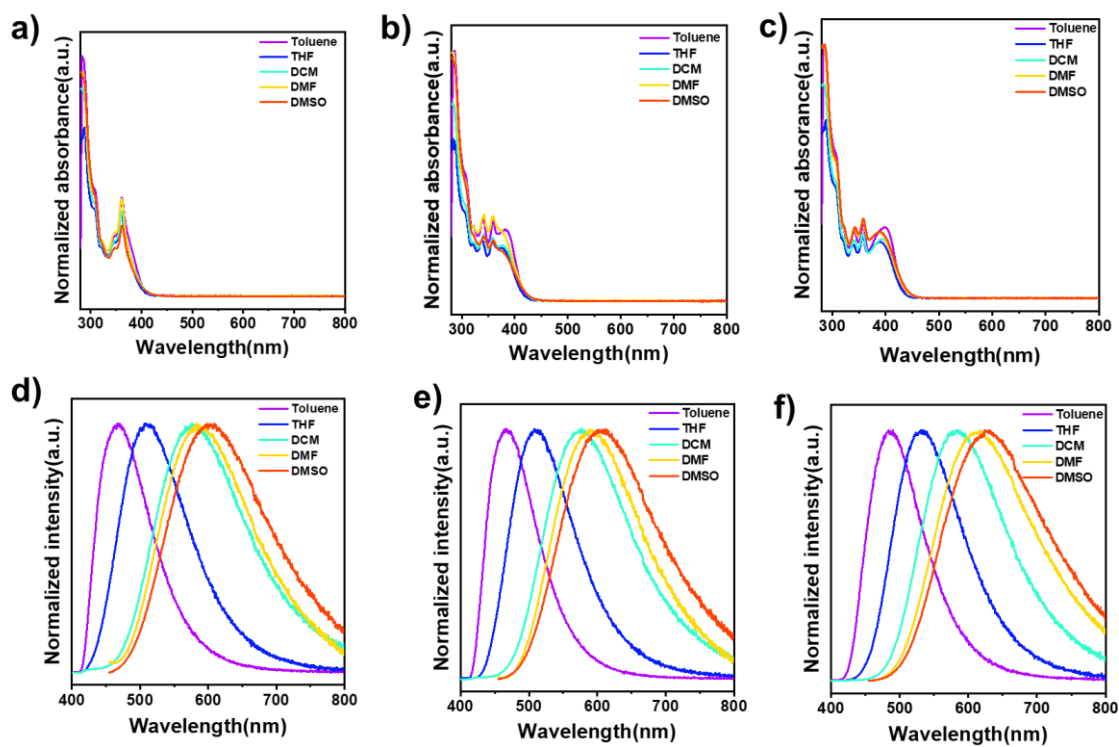

Fig. S18 Ultraviolet-visible absorption spectra of (a) 32cICBP, (b) 32cICXT, (c) 32PcCXt and PL spectra of (d) 32cICBP, (e) 32cICXT, (f) 32PcCXt in different solutions.

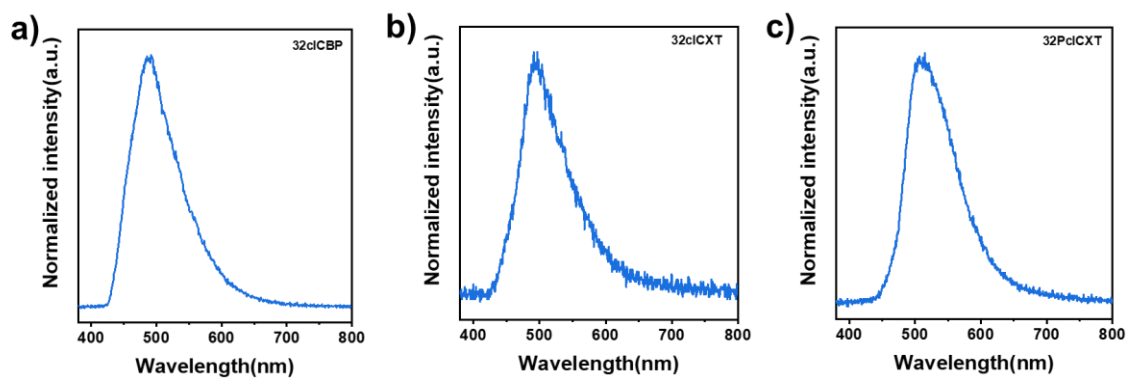

Fig. S19 Phosphorescence spectra of (a) 32clCBP, (b) 32clCXT and (c) 32PclCXT in DMSO solutions at 77 K.

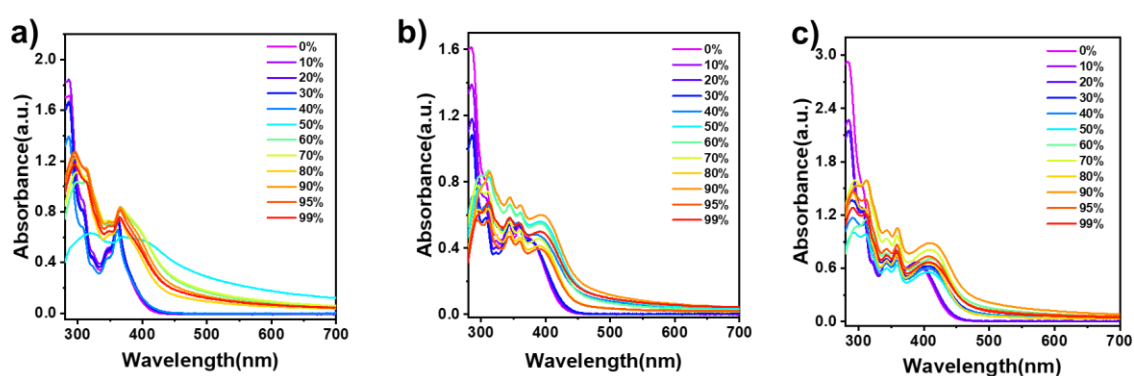

Fig. S20 Ultraviolet-visible absorption spectra of (a) 32clCBP, (b) 32clCXT, and (c) 32PclCXT in H<sub>2</sub>O/DMSO mixtures with different water contents.

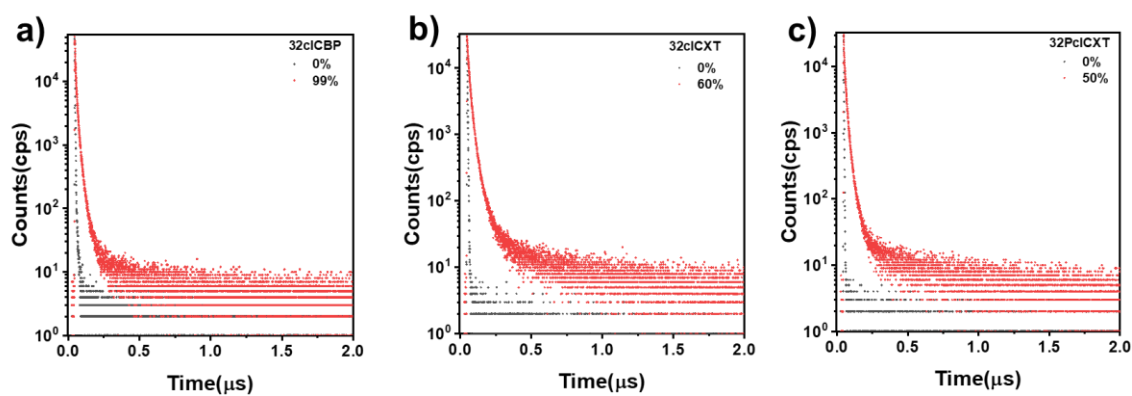

Fig. S21 The transient PL decays of (a) 32clCBP, (b) 32clCXT, and (c) 32PclCXT in DMSO/H<sub>2</sub>O mixtures.

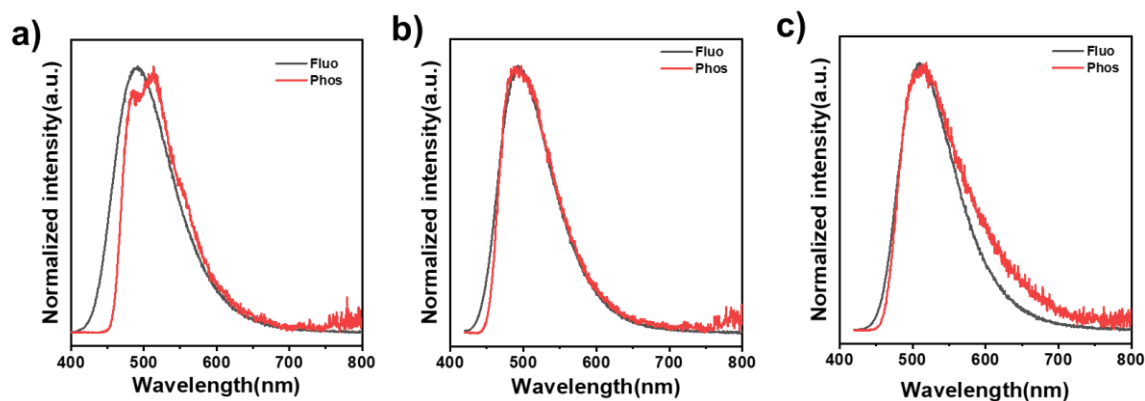

Fig. S22 Room-temperature fluorescence and phosphorescence spectra at 77 K of (a) 32cICBP, (b) 32cICXT and (c) 32PcICXT in doped films.

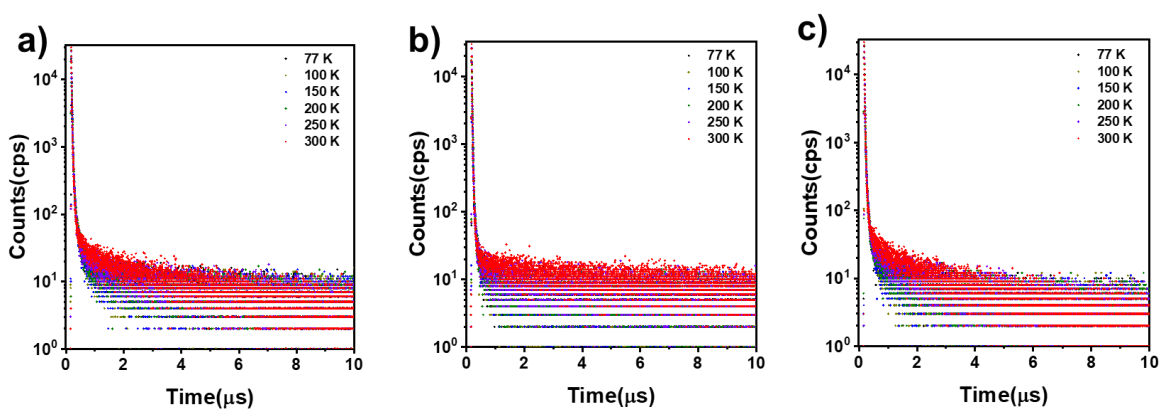

Fig. S23 Temperature-dependent transient PL decay spectra of (a) 32cICBP, (b) 32cICXT, and (c) 32PcICXT doped in DPEPO host with a doping concentration of 20 wt%, measured under nitrogen.

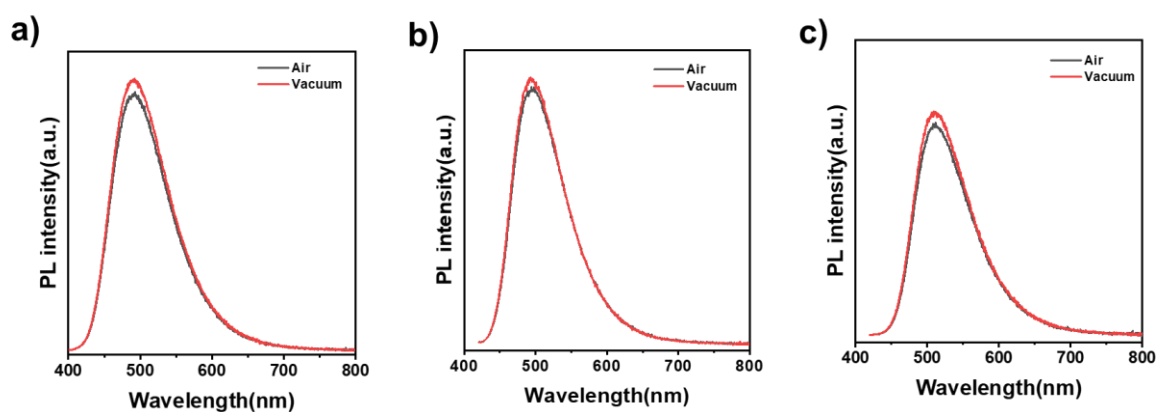

Fig. S24 PL spectra of (a) 32cICBP, (b) 32cICXT and (c) 32PcICXT in doped films under air and vacuum.

Table S2 Crystal data and structure refinement for the two single crystals.

| Compound                                    | 32cICBP                                                       | 32cICXT                                                       |
|---------------------------------------------|---------------------------------------------------------------|---------------------------------------------------------------|
| formula                                     | C <sub>37</sub> H <sub>24</sub> N <sub>2</sub> O              | C <sub>37</sub> H <sub>22</sub> N <sub>2</sub> O <sub>2</sub> |
| fw                                          | 512.58                                                        | 526.56                                                        |
| crystal system                              | triclinic                                                     | triclinic                                                     |
| T/K                                         | 150.0                                                         | 149.99(10)                                                    |
| space group                                 | P-1                                                           | P-1                                                           |
| a/Å                                         | 6.499(3)                                                      | 5.7116(5)                                                     |
| b/Å                                         | 11.218(4)                                                     | 12.3669(9)                                                    |
| c/Å                                         | 17.798(8)                                                     | 18.6670(14)                                                   |
| $\alpha$ /°                                 | 97.448(14)                                                    | 102.633(6)                                                    |
| $\beta$ /°                                  | 93.423(14)                                                    | 91.040(6)                                                     |
| $\gamma$ /°                                 | 90.73(2)                                                      | 92.503(6)                                                     |
| Volume/Å <sup>3</sup> , Z                   | 1284.1(9), 2                                                  | 1284.87(18), 2                                                |
| $\rho_{\text{calc}}$ /cm <sup>3</sup>       | 1.326                                                         | 1.361                                                         |
| $\mu$ /mm <sup>-1</sup>                     | 0.396                                                         | 0.085                                                         |
| F(000)                                      | 536.0                                                         | 548.0                                                         |
| Crystal size/mm <sup>3</sup>                | 0.3 × 0.008 × 0.005                                           | 0.18 × 0.12 × 0.08                                            |
| Radiation                                   | Ga K $\alpha$ ( $\lambda$ = 1.34138)                          | Mo K $\alpha$ ( $\lambda$ = 0.71073)                          |
| 2 $\Theta$ range for data collection/°      | 4.36 to 119.56                                                | 4.98 to 65.892                                                |
| Index ranges                                | -8 ≤ h ≤ 8, -14 ≤ k ≤ 13, -22<br>≤ l ≤ 22                     | -8 ≤ h ≤ 8, -18 ≤ k ≤ 18, -27 ≤ l<br>≤ 26                     |
| Reflections collected                       | 17318                                                         | 14566                                                         |
| Independent reflections                     | 5672 [R <sub>int</sub> = 0.0733, R <sub>sigma</sub> = 0.0830] | 8535 [R <sub>int</sub> = 0.0433, R <sub>sigma</sub> = 0.0990] |
| Data/restraints/parameters                  | 5672/0/362                                                    | 8535/0/370                                                    |
| Goodness-of-fit on F <sup>2</sup>           | 1.019                                                         | 0.991                                                         |
| Final R indexes [I ≥ 2 $\sigma$ (I)]        | R <sub>1</sub> = 0.0614, wR <sub>2</sub> = 0.1470             | R <sub>1</sub> = 0.0737, wR <sub>2</sub> = 0.1544             |
| Final R indexes [all data]                  | R <sub>1</sub> = 0.1119, wR <sub>2</sub> = 0.1763             | R <sub>1</sub> = 0.1437, wR <sub>2</sub> = 0.1950             |
| Largest diff. peak/hole / e Å <sup>-3</sup> | 0.31/-0.31                                                    | 0.36/-0.32                                                    |

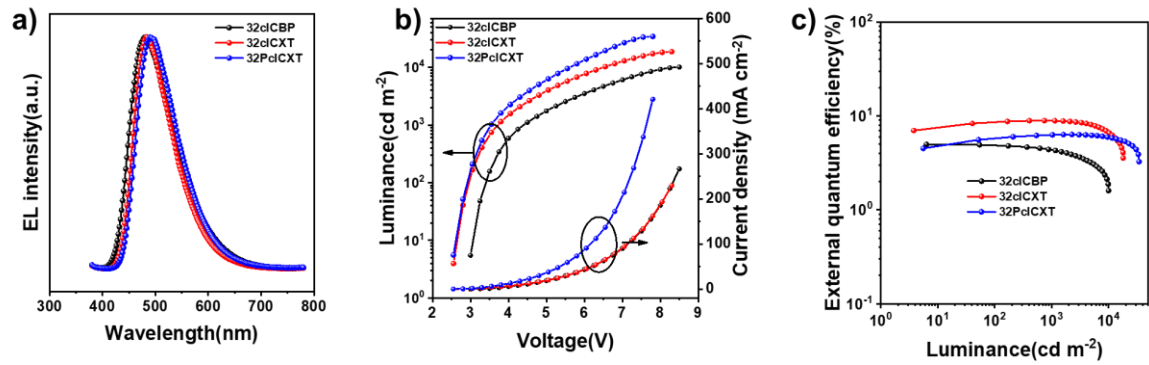

Fig. S25 (a) EL spectra, (b) luminance–voltage–current density, and (c) external quantum efficiency–luminance curves of non-doped OLEDs based on 32clCBP, 32clCXT and 32PclCXT.

Table S3 EL performances of the non-doped OLEDs based on 32clCBP, 32clCXT and 32PclCXT.

| EML      | $\lambda_{EL}$<br>[nm] | $V_{on}$<br>[V] | $L_{max}$<br>[cd/m <sup>2</sup> ] | $CE_{max}$<br>[cd/A] | $PE_{max}$<br>[lm/W] | $EQE_{max}$<br>[%] |
|----------|------------------------|-----------------|-----------------------------------|----------------------|----------------------|--------------------|
| 32clCBP  | 481                    | 3.0             | 10002                             | 11.9                 | 12.5                 | 5.0                |
| 32clCXT  | 484                    | 2.5             | 18700                             | 22.3                 | 22.7                 | 8.9                |
| 32PclCXT | 491                    | 2.5             | 34226                             | 17.4                 | 17.3                 | 6.3                |

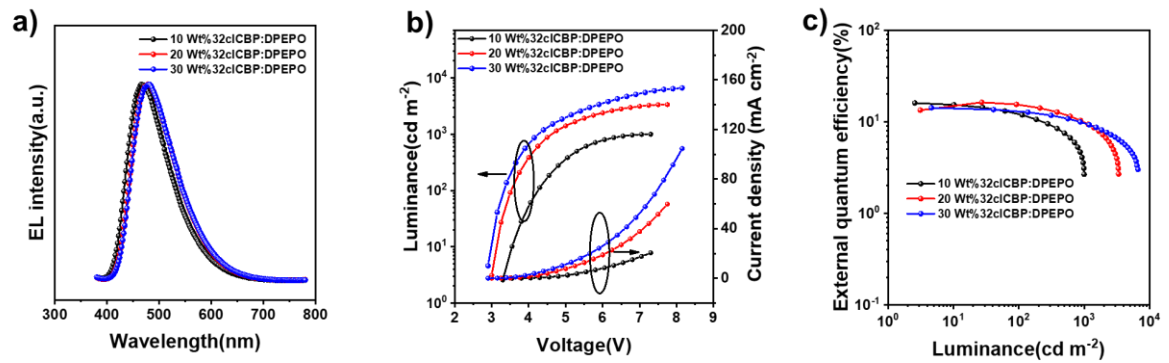

Fig. S26 (a) EL spectra, (b) luminance–voltage–current density, and (c) external quantum efficiency–luminance curves of doped OLEDs based on 32clCBP with different doping concentrations.

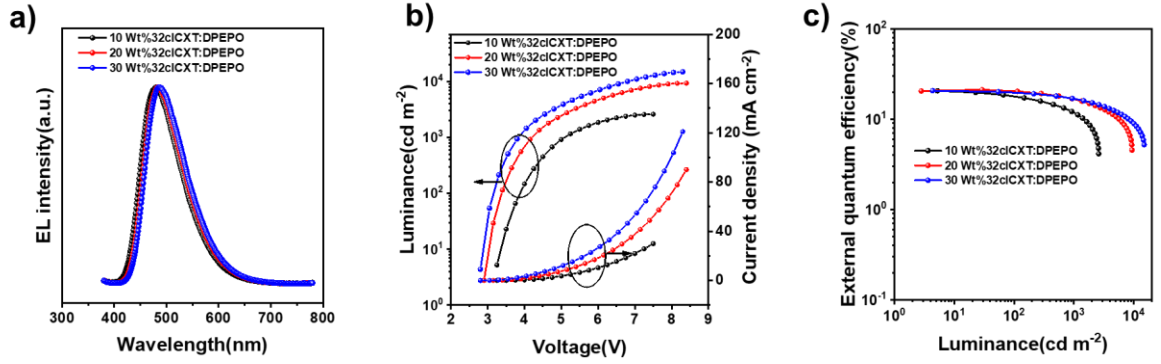

Fig. S27 (a) EL spectra, (b) luminance–voltage–current density, and (c) external quantum efficiency–luminance curves of doped OLEDs based on 32ClCXT with different doping concentrations.

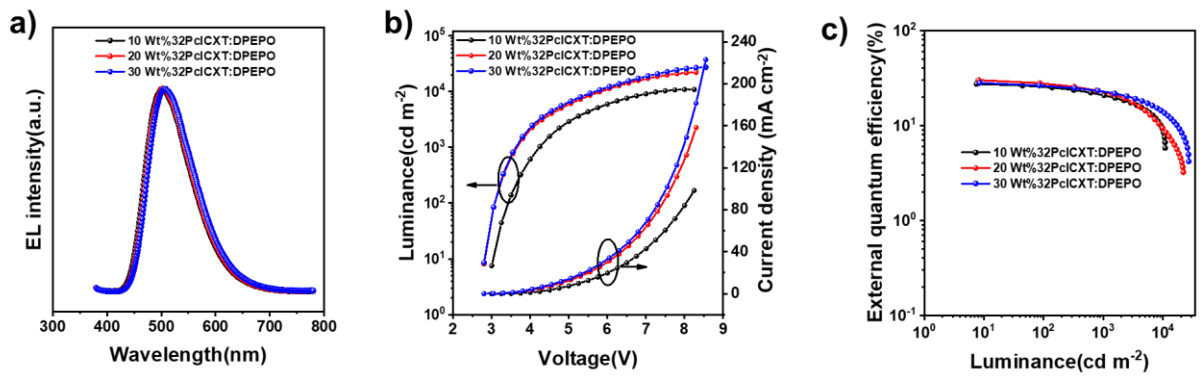

Fig. S28 (a) EL spectra, (b) luminance–voltage–current density, and (c) external quantum efficiency–luminance curves of doped OLEDs based on 32PclCXT with different doping concentrations.

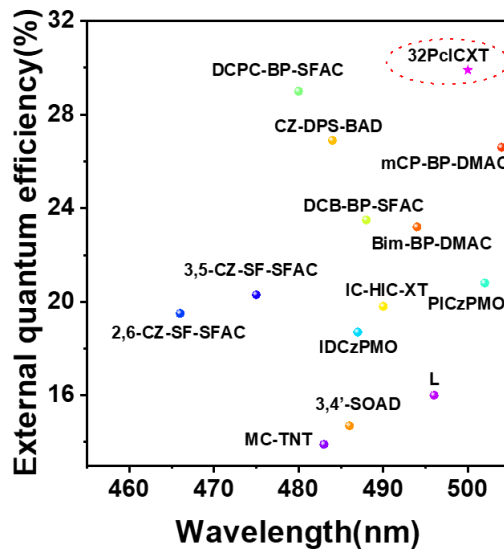

Fig. S29 EQE summary of TADF materials with EL spectral peaks between 465-505 nm.



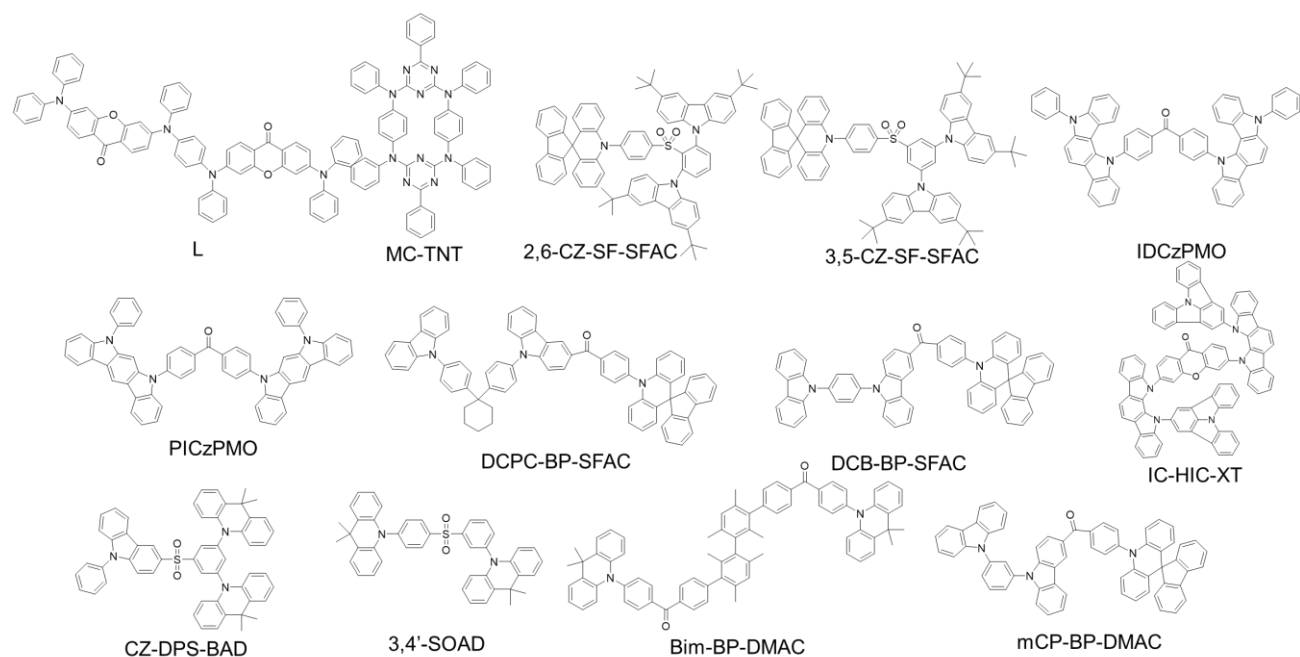

Fig. S30 Chemical structures of reported molecules listed in Fig. S29.

Table S4 Detailed EL performance summary of TADF materials listed in Fig. S29.

| Compound       | EL [nm] | EQE <sub>max</sub> [%] | Ref.      |
|----------------|---------|------------------------|-----------|
| 32PclCXT       | 500     | 29.9                   | This Work |
| L              | 496     | 16                     | 1         |
| MC-TNT         | 483     | 13.9                   | 2         |
| 2,6-CZ-SF-SFAC | 466     | 19.5                   | 3         |
| 3,5-CZ-SF-SFAC | 475     | 20.3                   | 3         |
| IDCzPMO        | 487     | 18.7                   | 4         |
| PICzPMO        | 502     | 20.8                   | 4         |
| DCPC-BP-SFAC   | 480     | 29.0                   | 5         |
| DCB-BP-SFAC    | 488     | 23.5                   | 6         |
| IC-HIC-XT      | 490     | 19.8                   | 7         |
| CZ-DPS-BAD     | 516     | 21.5                   | 8         |
| 3,4'-SOAD      | 486     | 14.7                   | 9         |
| Bim-BP-DMAC    | 494     | 23.2                   | 10        |
| mCP-BP-DMAC    | 504     | 26.6                   | 11        |

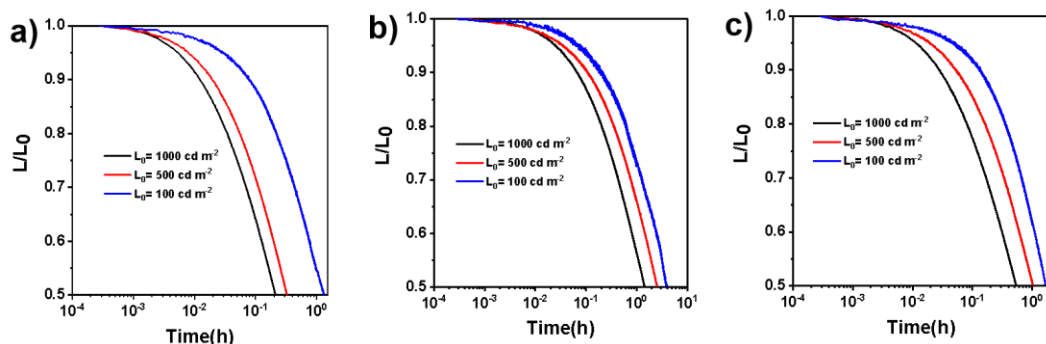

Fig. S31 Operational lifetimes of the 20 wt % doped devices based on (a) 32clCBP, (b) 32clCXT, and (c) 32PclCXT.

## References

1. Y. Fu, Z. Ye, D. Liu, Y. Mu, J. Xiao, D. Hu, S. Ji, Y. Huo and S.-J. Su, *Adv. Mater.*, 2023, **35**, 2301929.
2. J. Xiao, D. Liu, Y. Fu, W. Xie, Y. Mu, J.-X. Chen, Z. Ye, S. Ji, Y. Huo and S.-J. Su, *Angew. Chem. Int. Ed.*, 2024, e202415680.
3. J. Zhang, D. Li, W. Li, Y. Meng and Z. Ge, *Laser Photonics Rev.*, 2024, **18**, 2300758.
4. J. Wang, Y. Yang, F. Gu, X. Zhai, C. Yao, J. Zhang, C. Jiang and X. Xi, *ACS Appl. Mater. Interfaces*, 2023, **15**, 59643–59654.
5. Y. Fu, H. Liu, D. Yang, D. Ma, Z. Zhao and B. Z. Tang, *Adv. Opt. Mater.*, 2022, **10**, 2102339.
6. H. Chen, H. Liu, P. Shen, J. Zeng, R. Jiang, Y. Fu, Z. Zhao and B. Z. Tang, *Adv. Opt. Mater.*, 2021, **9**, 2002019.
7. X. Lan, J. Zeng, J. Chen, T. Yang, X. Dong, B. Z. Tang and Z. Zhao, *Angew. Chem. Int. Ed.*, 2024, e202414488.
8. J. Huo, S. Xiao, Y. Wu, M. Li, H. Tong, H. Shi, D. Ma and B. Z. Tang, *Chem. Eng. J.*, 2023, **452**, 138957.
9. J. Li, Y. Xia, G. Li, M. Chen, J. Zhou, W. Yan, B. Zhao, K. Guo and H. Wang, *Chem. Eng. J.*, 2023, **470**, 143966.
10. X.-L. Chen, X.-D. Tao, Z. Wei, L. Meng, F.-L. Lin, D.-H. Zhang, Y.-Y. Jing and C.-Z. Lu, *ACS Appl. Mater. Interfaces*, 2021, **13**, 46909-46918.
11. X. Wu, J. Zeng, X. Peng, H. Liu, B. Z. Tang and Z. Zhao, *Chem. Eng. J.*, 2023, **451**, 138919.
